# Supplementary material for: Serum starvation drives ALIX-dependent extracellular vesicle biogenesis and determines tumor progression
Source: JCI journal article supplement (doi:10.1172/jci.insight.197924), 2026-06-08
Supplement: sd1 [file 1]

## Supplementary materials

### Figure S1. Selection of the serum starvation time window.

(A–C) Apoptosis of Huh7 (A), HeLa (B), and HCT116 (C) cells cultured in 10% FBS or serum-starved for 24 or 48 h was analyzed by Annexin V/PI staining and flow cytometry. Representative plots are shown at left, with quantification of Annexin V-positive cells at right. n=3.

(D) Cell viability (OD450) of Huh7, HeLa, and HCT116 cells cultured in 10% FBS or under serum starvation was measured at 0, 24, 48, and 72 h. n=3.

Data are presented as mean  $\pm$  SD. Statistical analyses were performed using either ordinary one-way ANOVA followed by Tukey's multiple comparisons test or two-way ANOVA followed by Sidak's multiple comparisons test. ns, not significant, \*\* $P < 0.01$ , \*\*\* $P < 0.001$ .

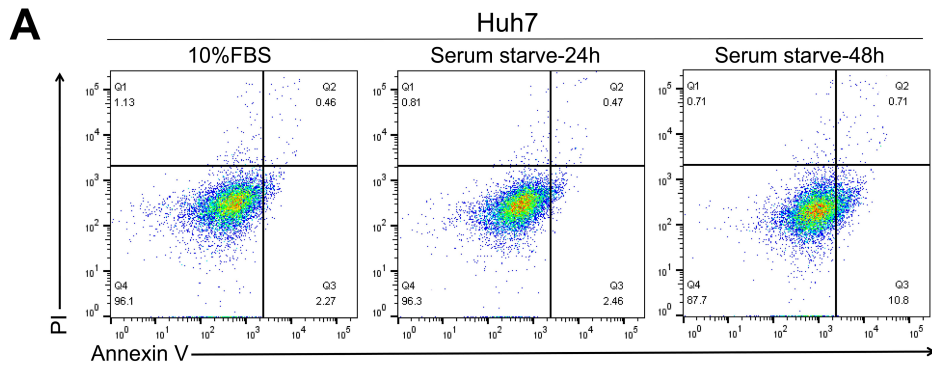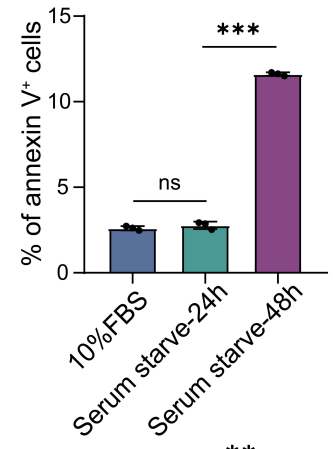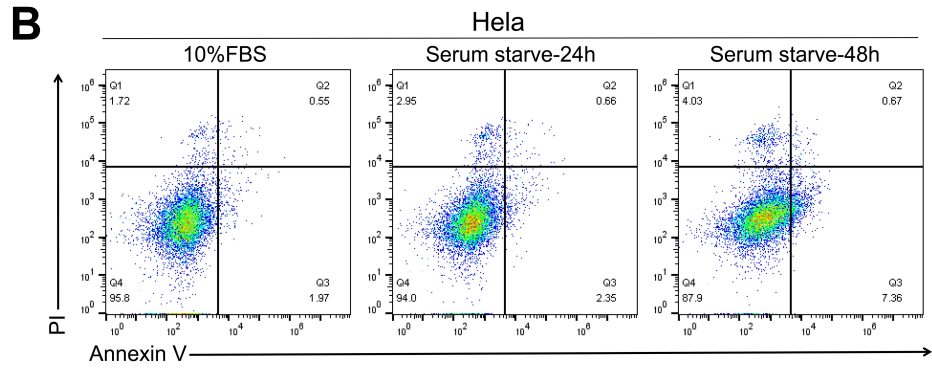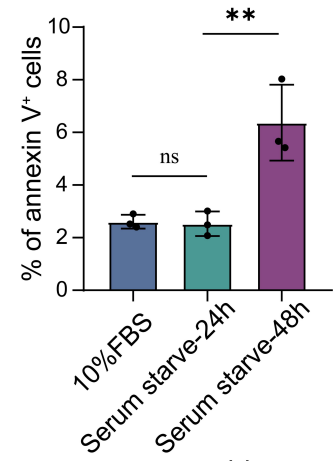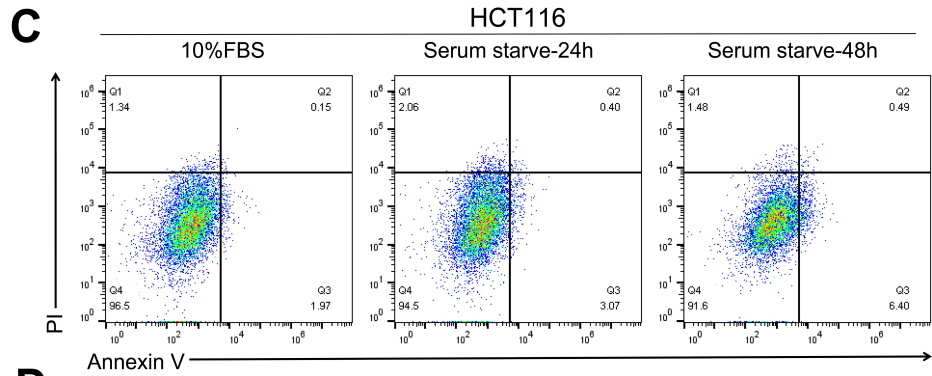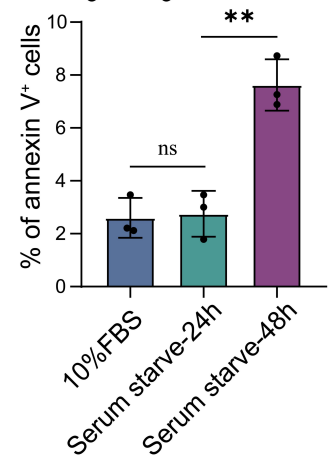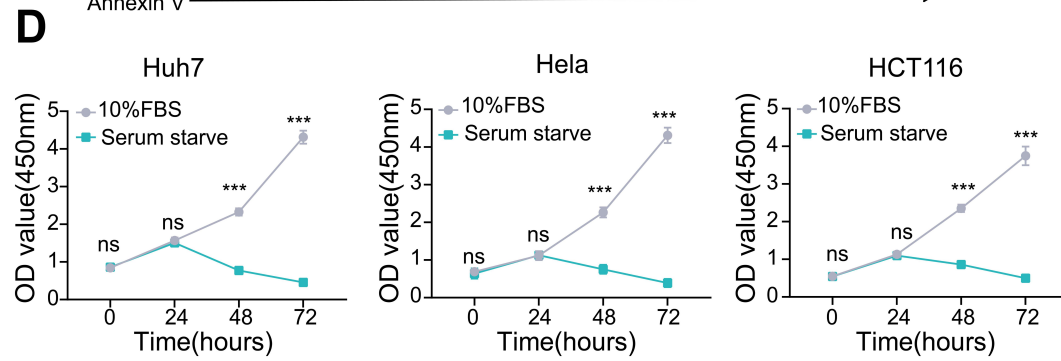

**Figure S2. Serum starvation induces EVs secretion**

(A) Western blot analysis of classical EV markers (CD63, CD81, TSG101, CD9, ALIX, and HRS) in HCT116-EVs; calnexin served as a negative control for cellular contamination. Right, quantification of EV marker expression in HCT116-EVs. n=3.

(B) NTA of EVs size distribution and concentration in HCT116 cells under 10% FBS or serum starvation.

(C) NTA comparison of mean EVs size from HeLa, Huh7, and HCT116 cells under 10% FBS or serum starvation. n=3.

(D) Total EVs concentration of HeLa-, Huh7-, and HCT116-derived EVs measured by NTA. n=3.

(E) NTA measurement of EVs (<200 nm) in HeLa-EVs, Huh7-EVs, and HCT116-EVs. n=3.

Data are presented as mean  $\pm$  SD. Comparisons between 2 groups were done with 2-tailed Student's t test. ns, not significant, \* $P < 0.05$ , \*\* $P < 0.01$ , \*\*\* $P < 0.001$ .

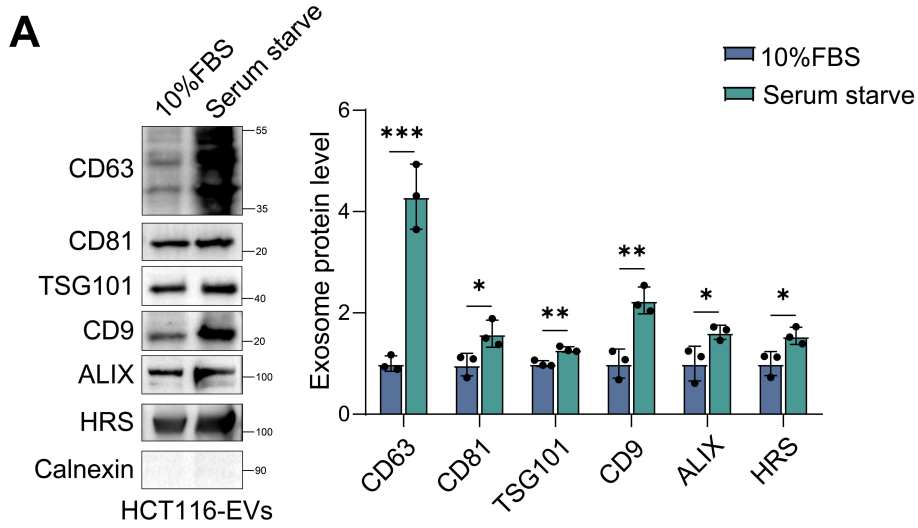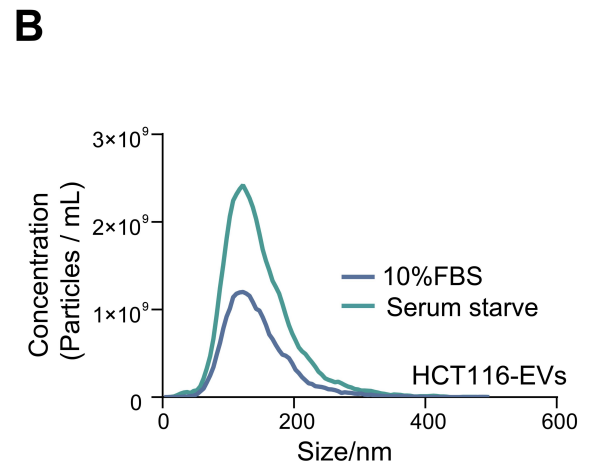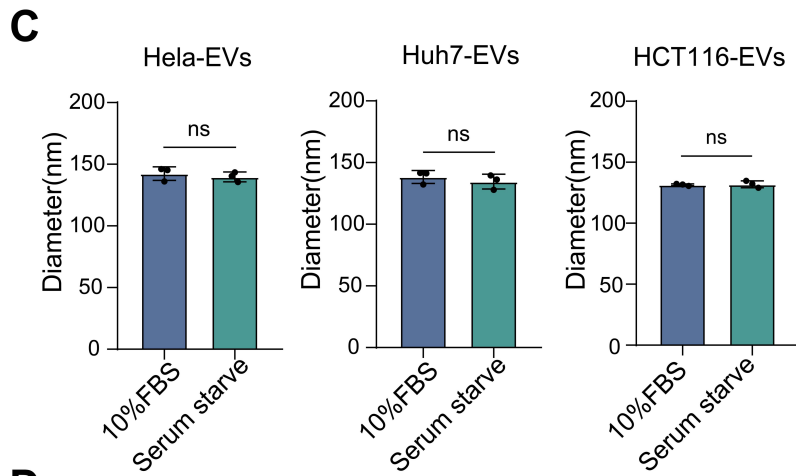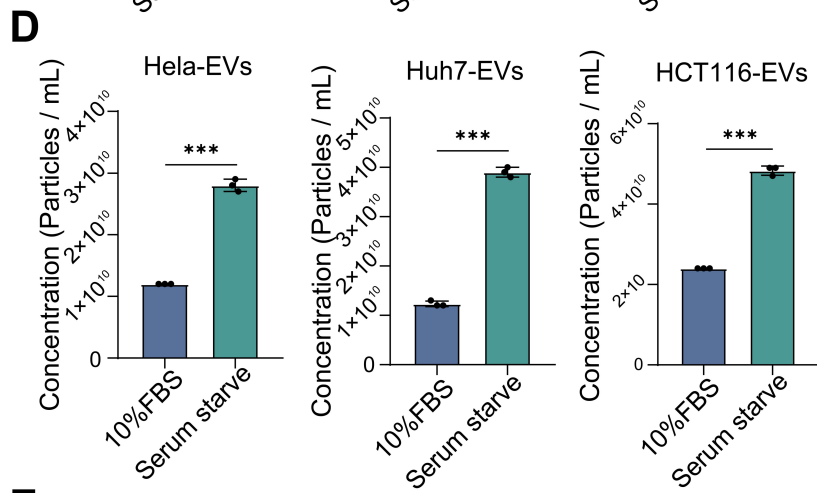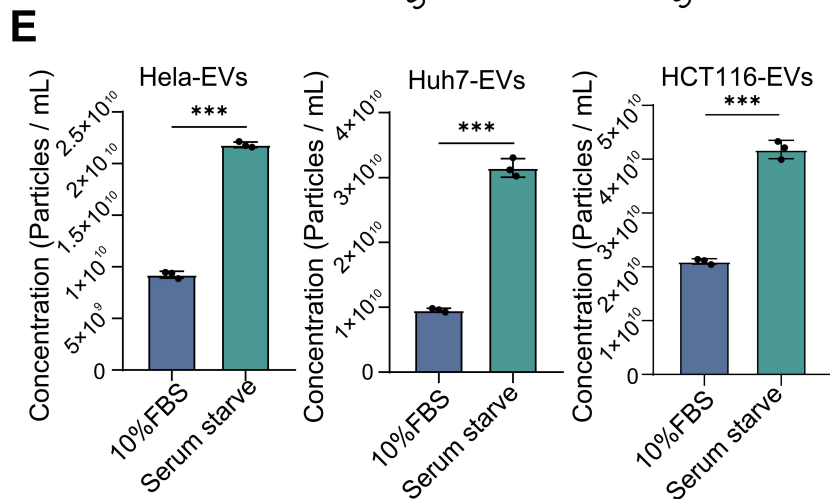

**Figure S3. Identification of ANXA3 as a key EV cargo protein regulated by serum starvation**

(A) GO cellular component hierarchical analysis (tree map) of the enrichment results in Fig. 3D.

Red boxes indicate terms highlighted in Fig. 3D, blue boxes indicate vesicle membrane-related hierarchies, and yellow boxes indicate non-hierarchical associations.

(B) Quantification of ANXA3, ANXA1, ANXA5, and ANXA6 in HeLa-EVs, Huh7-EVs, and HCT116-EVs. n=3.

(C) GSEA of exosomal membrane-associated proteins showing enrichment of vesicle membrane-related proteins under serum starvation.

(D) Western blot analysis of ANXA3 and TSG101 in EVs from THLE-2, Huh7, HcerEpic, HeLa, NCM460, and HCT116 cells cultured in 10% FBS or under serum starvation.

(E) Quantification of ANXA3 protein levels. n=3.

Data are presented as mean  $\pm$  SD. Comparisons between 2 groups were done with 2-tailed Student's t test. ns, not significant, \* $P < 0.05$ , \*\* $P < 0.01$ , \*\*\* $P < 0.001$ .



**Figure S4. Autophagy does not participate in ANXA3 secretion**

(A) Western blot analysis of ANXA3 in EVs from HCT116 cells cultured in 10% FBS or under serum starvation, with TSG101 and CD63 as EV markers. Right, quantification of ANXA3.  $n = 3$ .

(B) Confocal images of CD63-GFP (green) and endogenous CD63 (red) in cells. Right, line-scan analysis of fluorescence intensity. Scale bar, 10  $\mu\text{m}$ .

(C) Western blot analysis of LC3 I/II and ATG3 in HeLa and Huh7 cells transfected with shCtrl or shATG3.  $\beta$ -actin served as a loading control.

(D) Western blot analysis of ANXA3 in HeLa-EVs and Huh7-EVs after shCtrl or shATG3 transfection, with TSG101 as an EV marker. Bottom, quantification.  $n = 3$ .

Data are presented as mean  $\pm$  SD. Comparisons between 2 groups were done with 2-tailed Student's  $t$  test. ns, not significant,  $*P < 0.05$ .

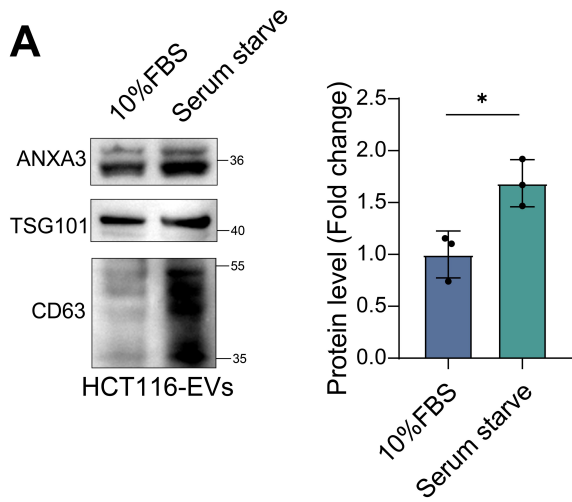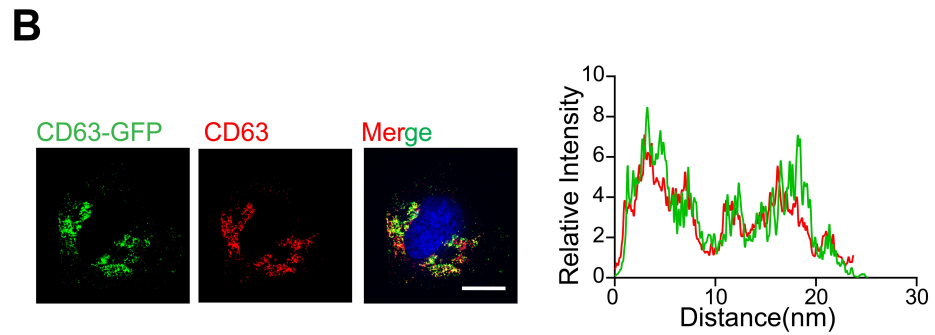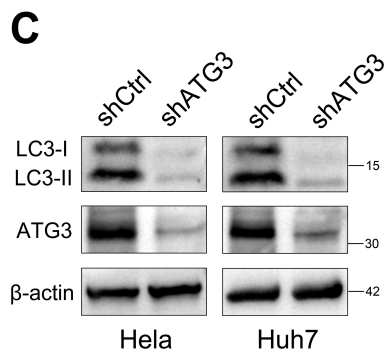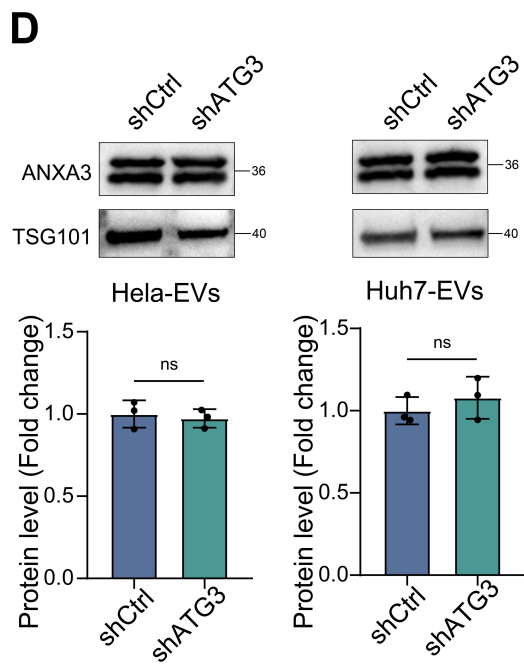

**Figure S5. ANXA3 sorting into MVBs requires ALIX but not HRS**

(A) Western blot validation of ALIX or HRS knockdown in Huh7 and HeLa cells, with  $\beta$ -actin as a loading control.

(B) Co-IP analysis in Huh7 cells using anti-ANXA3, anti-ALIX, or anti-HRS to examine interactions among ANXA3, ALIX, HRS, and CHMP4B. IgG served as a negative control. Upper, immunoblots; lower, input controls.

(C) Quantification of ALIX co-precipitated with ANXA3 and ANXA3 co-precipitated with ALIX under 10% FBS or serum starvation.  $n = 3$ .

(D, E) Co-IP (IP: HRS) in HeLa (D) and Huh7 (E) cells cultured in 10% FBS or under serum starvation, followed by immunoblotting for ANXA3 and HRS. Whole-cell lysates were used as input.

(F) Co-IP (IP: HRS-Myc) in HeLa cells expressing HRS-Myc under 10% FBS or serum starvation to examine the interaction between ANXA3 and HRS-Myc.  $\beta$ -actin served as a loading control.

Data are presented as mean  $\pm$  SD. Comparisons between 2 groups were done with 2-tailed Student's  $t$  test. ns, not significant,  $*P < 0.05$ .

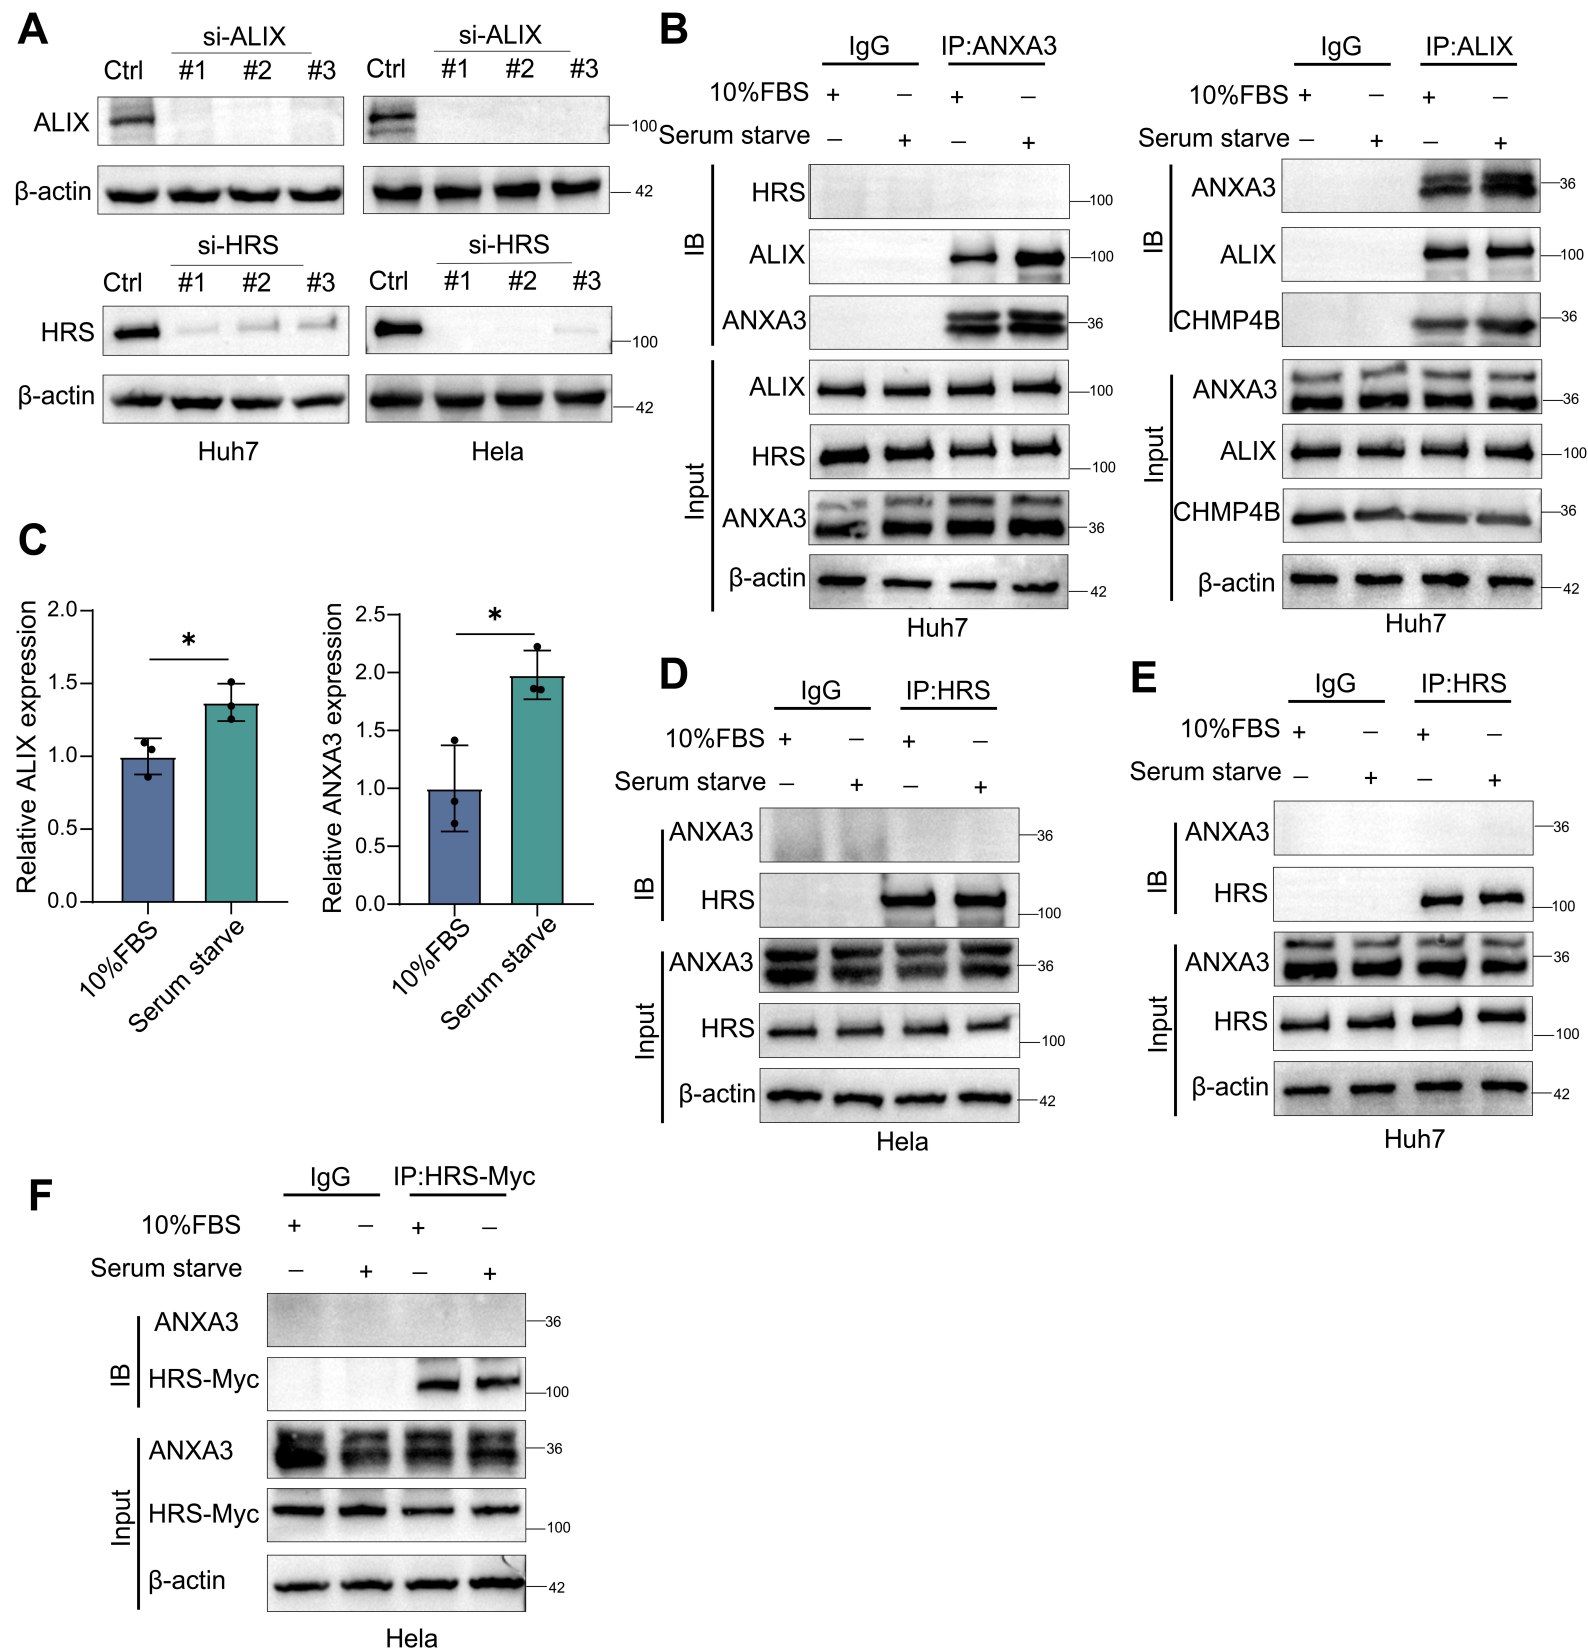

**Figure S6. Construction and validation of cell lines expressing ALIX mutant lacking the PRR domain**

(A) Western blot analysis of ANXA3 in HeLa, Huh7, and HCT116 cells transfected with Ctrl or different sgANXA3 constructs (#1, #2, #3), with  $\beta$ -actin as a loading control.

(B) Confocal images of ALIX localization in HeLa, Huh7, and HCT116 cells transfected with empty vector (Ctrl) or ALIX $\Delta$ PRR-mCherry. Red, mCherry; blue, DAPI. ALIX $\Delta$ PRR-mCherry was diffusely distributed in the cytoplasm. Scale bar, 10  $\mu$ m.

(C) Western blot analysis of ALIX expression in HeLa, Huh7, and HCT116 cells transfected with ALIX $\Delta$ PRR-mCherry or empty vector, with  $\beta$ -actin as a loading control.

(D) Representative wound-healing images showing migration in each group at 0 and 24 h. Scale bar: 100  $\mu$ m.

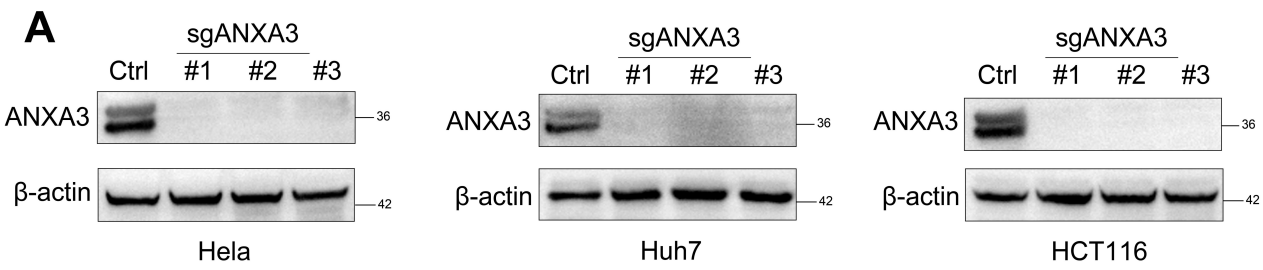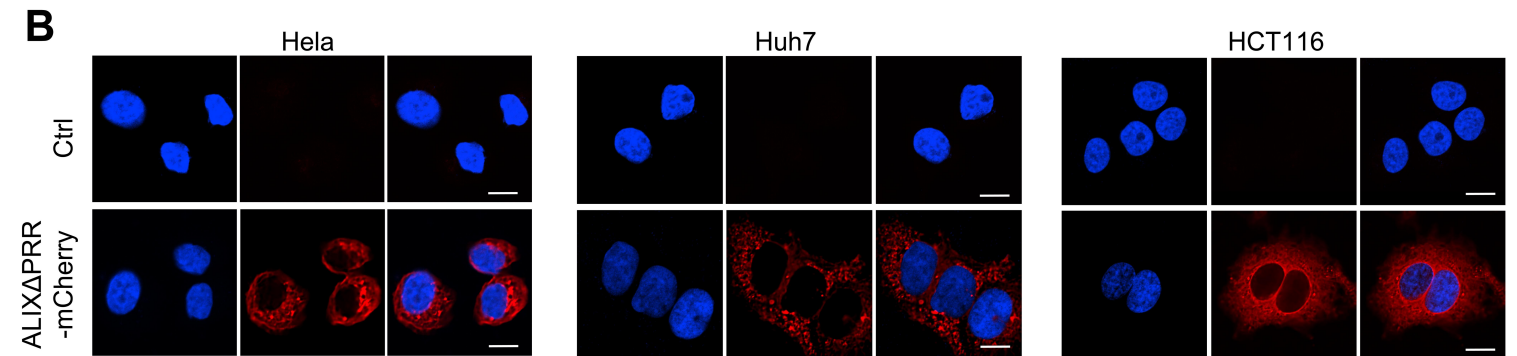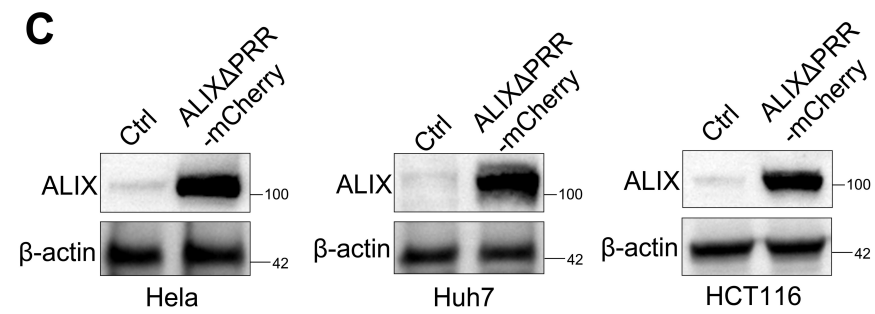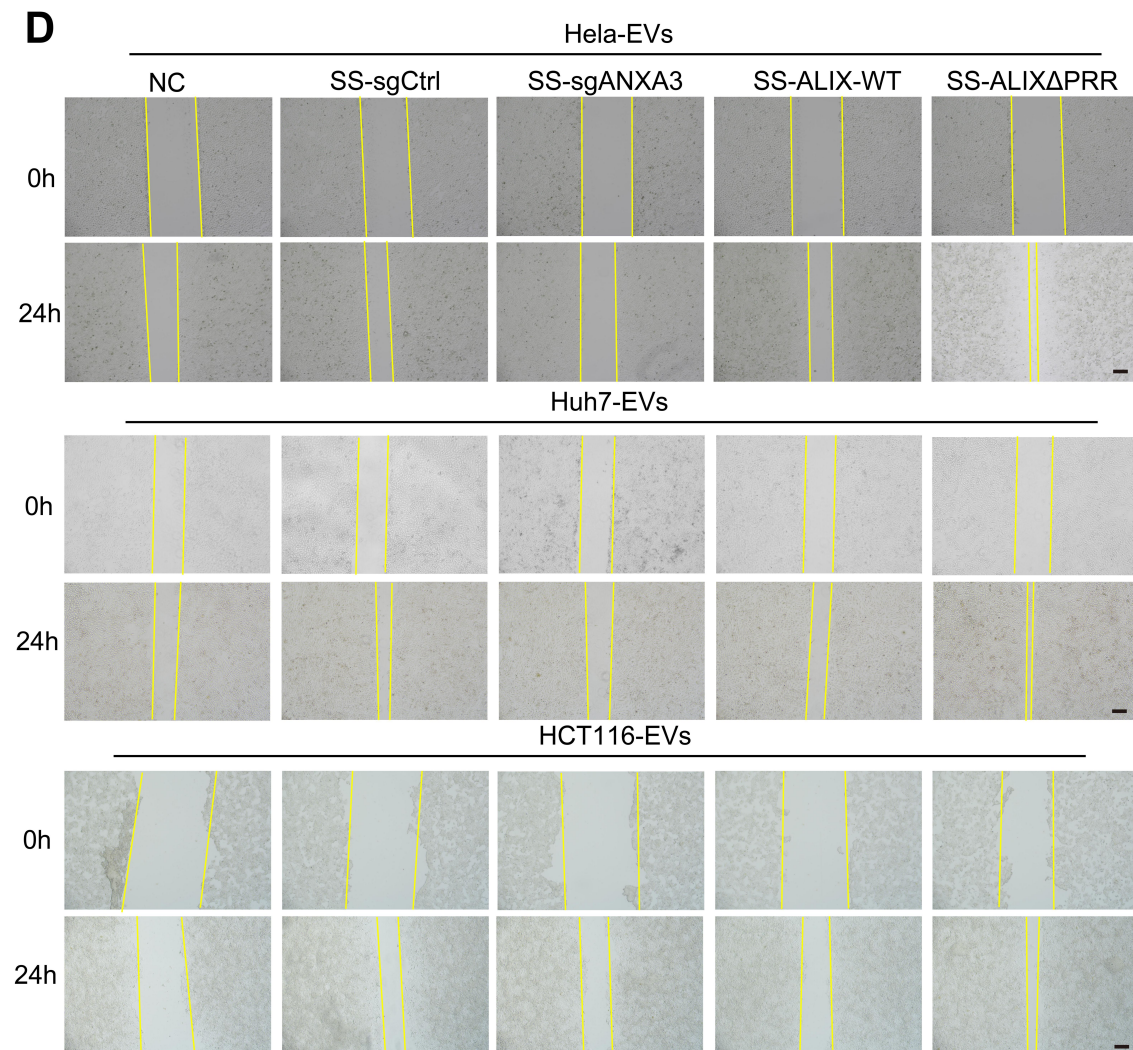

**Figure S7. Genetic knockout of ALIX or ANXA3 attenuates the tumor-promoting effects of serum starvation-induced EVs in vivo**

(A) Western blot validation of ALIX knockout in cancer cells transduced with sgALIX.

(B) Representative images of subcutaneous tumors derived from control or ALIX-knockout cells treated with NC-EVs or SS-EVs.

(C, D) Quantification of tumor weight (C) and tumor volume (D) in the indicated groups.  $n = 6$ .

(E) Representative H&E and Ki-67 staining of tumor sections from control or ALIX-knockout cells treated with NC-EVs or SS-EVs.

(F) Quantification of Ki-67-positive cells in tumors shown in (E).  $n = 6$ .

(G) Representative images of subcutaneous tumors derived from control or ANXA3-knockout cells treated with NC-EVs or SS-EVs.

(H, I) Quantification of tumor weight (H) and tumor volume (I) in the indicated groups.  $n = 6$ .

(J) Representative H&E and Ki-67 staining of tumor sections from control or ANXA3-knockout cells treated with NC-EVs or SS-EVs.

(K) Quantification of Ki-67-positive cells in tumors shown in (J).  $n = 6$ .

Data are presented as mean  $\pm$  SD. Statistical analysis was performed using two-way ANOVA followed by Sidak's multiple comparisons test.  $*P < 0.05$ ,  $**P < 0.01$ ,  $***P < 0.001$ .

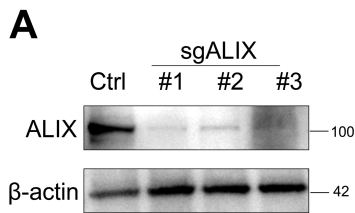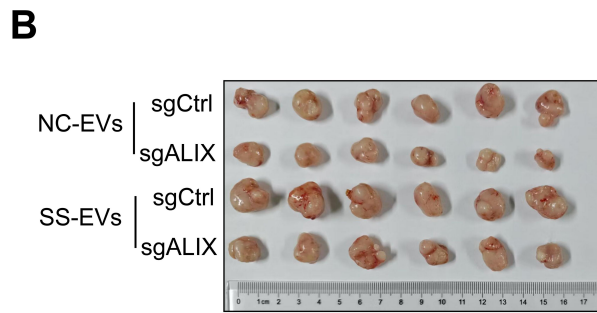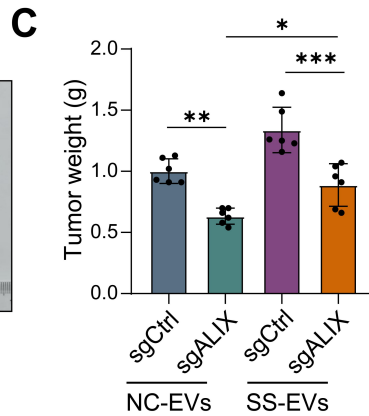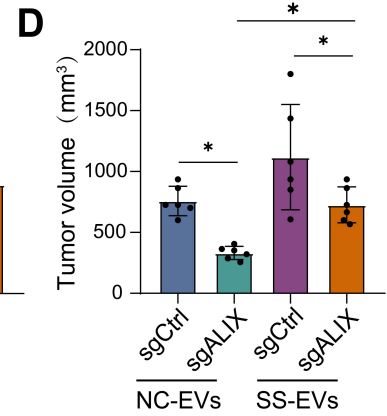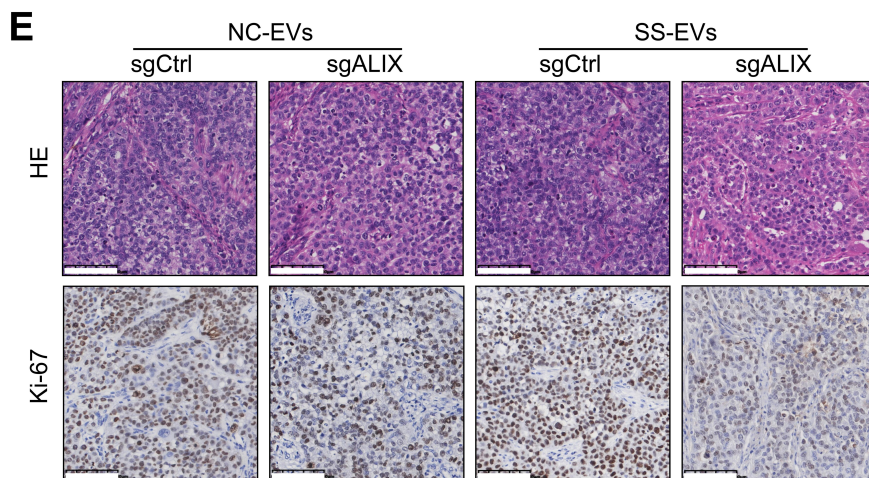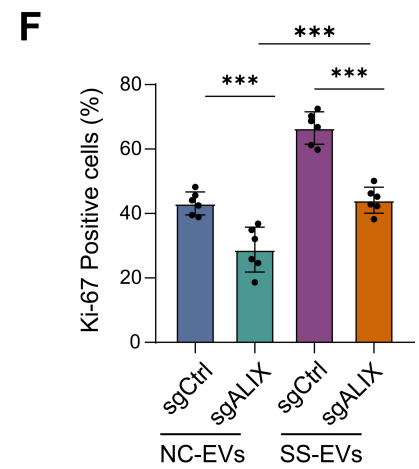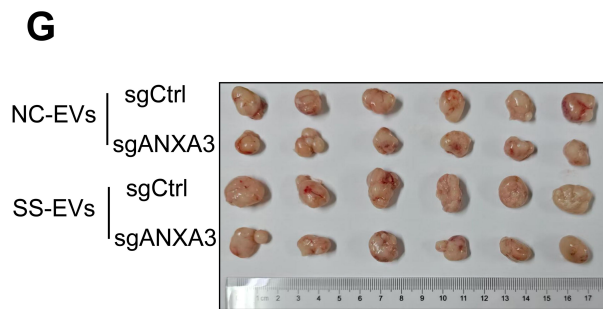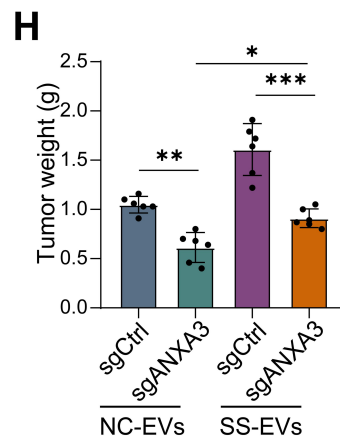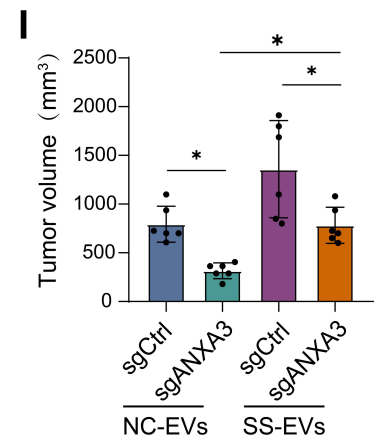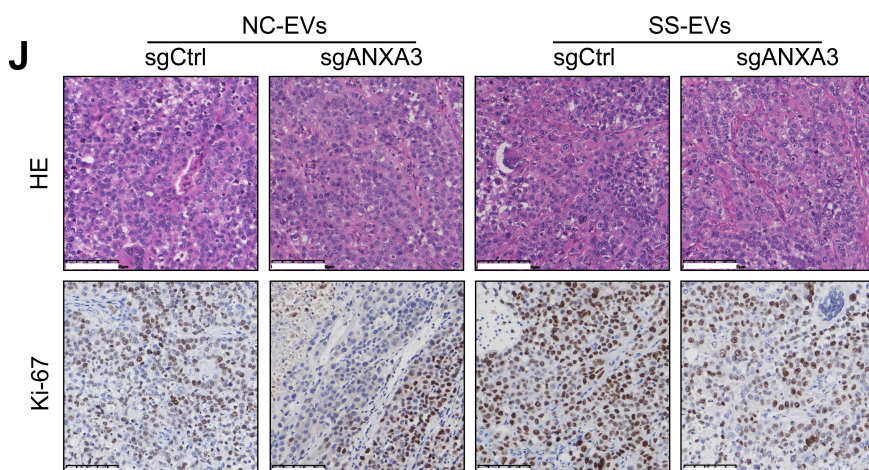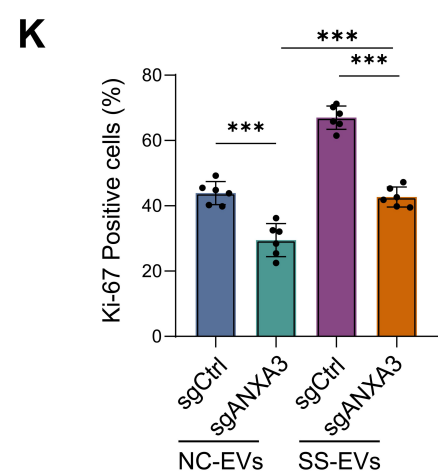

**Figure S8. Characterization of CRC tissues and organoids**

(A) Bright-field images of primary CRC-derived organoids from day 1 to day 5. Scale bar, 100  $\mu\text{m}$ .

(B) H&E staining of tumor tissues and organoid sections. Scale bar, 200  $\mu\text{m}$ .

(C) IHC staining of tumor tissues and organoid sections for Ki67, CK20, CDX2, Villin, and CK7. Scale bar, 200  $\mu\text{m}$ .

(D) Confocal images showing Ki67, CDX2, and CK20 expression in organoids. Nuclei were stained with DAPI. Scale bar, 100  $\mu\text{m}$ .

(E) TEM images showing organoid ultrastructure. Scale bar, 5  $\mu\text{m}$ ; enlarged view at right.

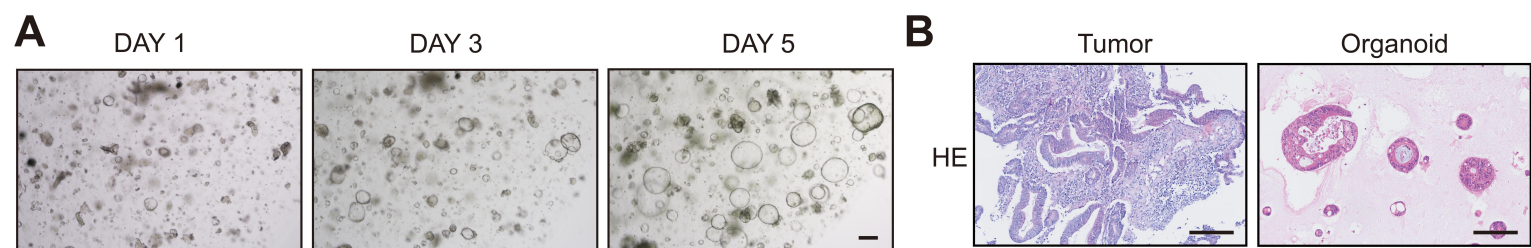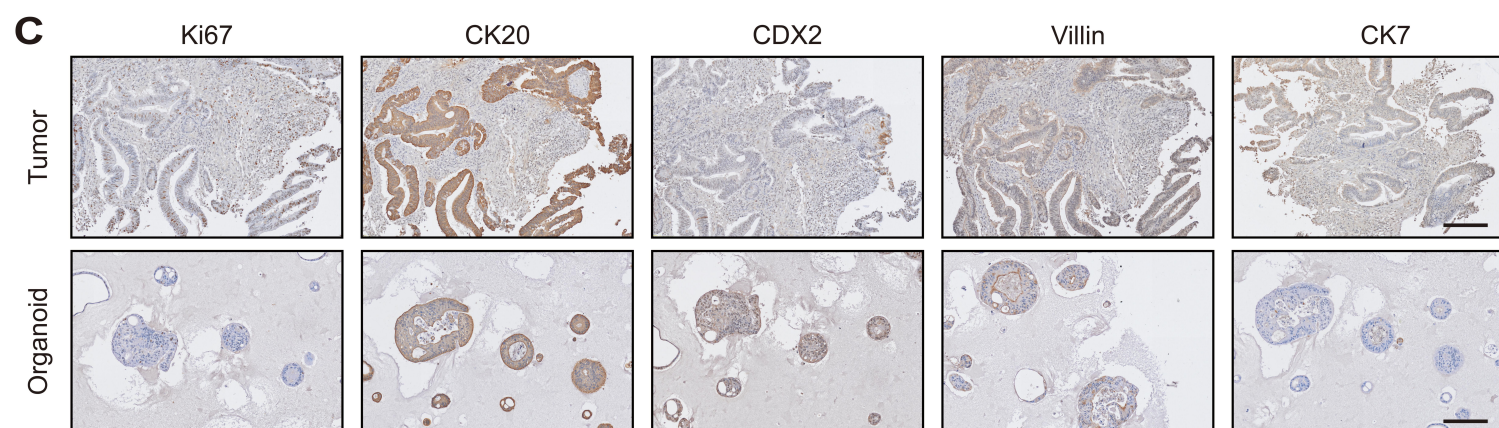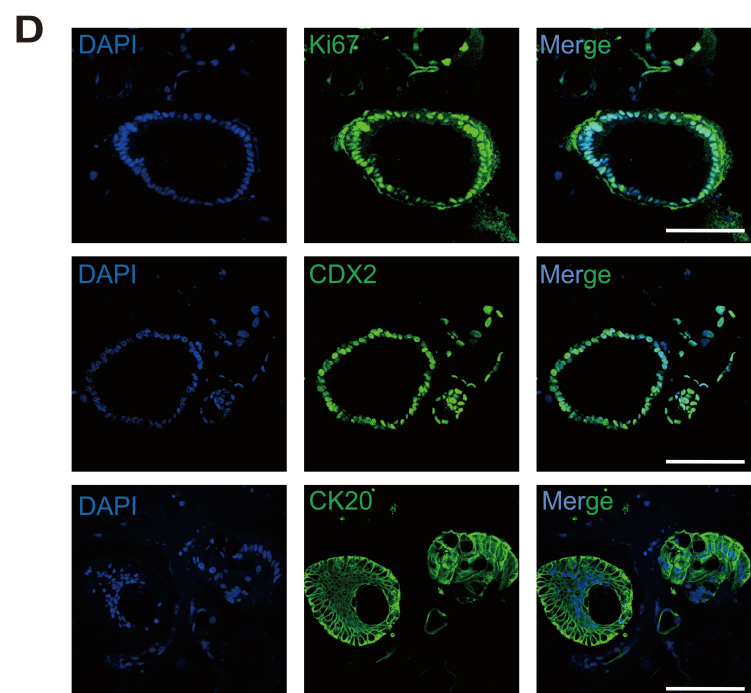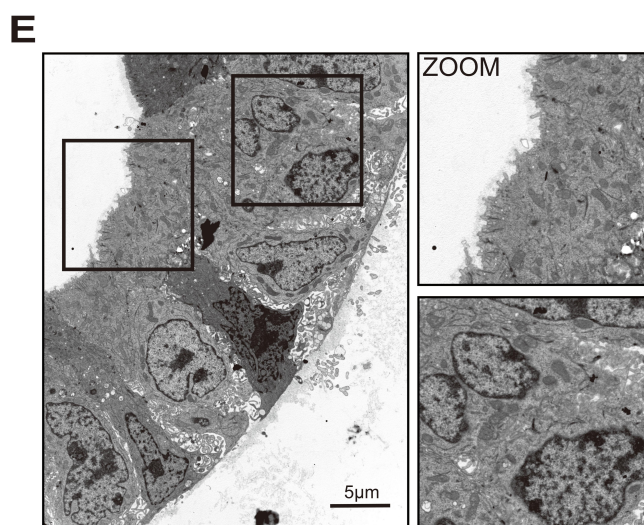

Table S1. GO enrichment analysis of serum starvation-specific EV proteins.

| Category         | Term       | Description                                                               | Count | Percentage (%) | P value | Genes                                                                                                                        | Fold Enrichment |
|------------------|------------|---------------------------------------------------------------------------|-------|----------------|---------|------------------------------------------------------------------------------------------------------------------------------|-----------------|
| GOTERM_BP_DIRECT | GO:0007015 | actin filament organization                                               | 3     | 11.11          | 0.02    | MARCKS, MYO6, RHOF                                                                                                           | 14.60           |
| GOTERM_BP_DIRECT | GO:0045742 | positive regulation of epidermal growth factor receptor signaling pathway | 2     | 7.41           | 0.04    | RALA, RALB                                                                                                                   | 52.34           |
| GOTERM_BP_DIRECT | GO:0006915 | apoptotic process                                                         | 4     | 14.81          | 0.04    | MARCKS, RALB, CD47, S100A9                                                                                                   | 5.12            |
| GOTERM_BP_DIRECT | GO:0043542 | endothelial cell migration                                                | 2     | 7.41           | 0.04    | S100A9, FSTL1                                                                                                                | 42.17           |
| GOTERM_BP_DIRECT | GO:0051603 | proteolysis involved in protein catabolic process                         | 2     | 7.41           | 0.06    | PSMB7, CTSZ                                                                                                                  | 33.73           |
| GOTERM_BP_DIRECT | GO:0031623 | receptor internalization                                                  | 2     | 7.41           | 0.06    | RALA, RALB                                                                                                                   | 29.19           |
| GOTERM_BP_DIRECT | GO:0098869 | cellular oxidant detoxification                                           | 2     | 7.41           | 0.09    | GSTO1, S100A9                                                                                                                | 20.51           |
| GOTERM_BP_DIRECT | GO:0006954 | inflammatory response                                                     | 3     | 11.11          | 0.10    | CD47, LYZ, S100A9                                                                                                            | 5.40            |
| GOTERM_CC_DIRECT | GO:0070062 | extracellular exosome                                                     | 19    | 70.37          | 0.00    | RALA, GRN, RALB, GSTO1, CTSZ, TACSTD2, TALDO1, RHOF, LYZ, FSTL1, CST3, MARCKS, S100A16, PIP, MYO6, CD47, DIP2B, S100A9, DSC1 | 6.51            |
| GOTERM_CC_DIRECT | GO:0005576 | extracellular region                                                      | 10    | 37.04          | 0.00    | CST3, PSMB7, GRN, CDSN, DNAH5, PIP, CTSZ, LYZ, S100A9, FSTL1                                                                 | 3.68            |

|                  |            |                              |    |       |      |                                                                                                            |       |
|------------------|------------|------------------------------|----|-------|------|------------------------------------------------------------------------------------------------------------|-------|
| GOTERM_CC_DIRECT | GO:0005886 | plasma membrane              | 16 | 59.26 | 0.00 | RALA, GRN, RALB, CDSN, PCDHGC4, CTSZ, RHOF, CST3, MARCKS, S100A16, MYO6, CD47, S100A9, DSC1, JAK1, SLC29A2 | 2.21  |
| GOTERM_CC_DIRECT | GO:0005615 | extracellular space          | 9  | 33.33 | 0.00 | CST3, GRN, S100A16, PIP, CTSZ, TACSTD2, LYZ, S100A9, FSTL1                                                 | 3.42  |
| GOTERM_CC_DIRECT | GO:1904813 | ficolin-1-rich granule lumen | 3  | 11.11 | 0.01 | CST3, PSMB7, CTSZ                                                                                          | 18.57 |
| GOTERM_CC_DIRECT | GO:0005938 | cell cortex                  | 3  | 11.11 | 0.02 | MARCKS, CTSZ, MYO6                                                                                         | 13.90 |
| GOTERM_CC_DIRECT | GO:0030057 | desmosome                    | 2  | 7.41  | 0.03 | CDSN, DSC1                                                                                                 | 55.26 |
| GOTERM_CC_DIRECT | GO:0005788 | endoplasmic reticulum lumen  | 3  | 11.11 | 0.06 | CST3, CTSZ, FSTL1                                                                                          | 7.46  |
| GOTERM_CC_DIRECT | GO:0005768 | endosome                     | 3  | 11.11 | 0.06 | GRN, MYO6, JAK1                                                                                            | 6.97  |
| GOTERM_CC_DIRECT | GO:1904724 | tertiary granule lumen       | 2  | 7.41  | 0.07 | CST3, LYZ                                                                                                  | 27.63 |
| GOTERM_CC_DIRECT | GO:0001533 | cornified envelope           | 2  | 7.41  | 0.07 | CDSN, DSC1                                                                                                 | 25.79 |
| GOTERM_CC_DIRECT | GO:0035580 | specific granule lumen       | 2  | 7.41  | 0.08 | CTSZ, LYZ                                                                                                  | 24.56 |
| GOTERM_CC_DIRECT | GO:0030139 | endocytic vesicle            | 2  | 7.41  | 0.08 | RALA, MYO6                                                                                                 | 22.75 |
| GOTERM_MF_DIRECT | GO:0005509 | calcium ion binding          | 5  | 18.52 | 0.02 | S100A16, PCDHGC4, S100A9, DSC1, FSTL1                                                                      | 4.79  |

|                         |                   |                                         |          |              |             |                         |              |
|-------------------------|-------------------|-----------------------------------------|----------|--------------|-------------|-------------------------|--------------|
| <b>GOTERM_MF_DIRECT</b> | <b>GO:0003925</b> | <b>G protein activity</b>               | <b>2</b> | <b>7.41</b>  | <b>0.07</b> | <b>RALA, RALB</b>       | <b>28.60</b> |
| <b>GOTERM_MF_DIRECT</b> | <b>GO:0031625</b> | <b>ubiquitin protein ligase binding</b> | <b>3</b> | <b>11.11</b> | <b>0.07</b> | <b>RALA, RALB, JAK1</b> | <b>6.90</b>  |
| <b>GOTERM_MF_DIRECT</b> | <b>GO:0003924</b> | <b>GTPase activity</b>                  | <b>3</b> | <b>11.11</b> | <b>0.08</b> | <b>RALA, RALB, RHOF</b> | <b>6.02</b>  |
| <b>GOTERM_MF_DIRECT</b> | <b>GO:0019003</b> | <b>GDP binding</b>                      | <b>2</b> | <b>7.41</b>  | <b>0.10</b> | <b>RALA, RALB</b>       | <b>18.57</b> |

**Table S2. GSEA results for vesicle membrane-related gene sets.**

|    | Symbol   | Rank in Gene List | Rank Metric Score | Core Enrichment |
|----|----------|-------------------|-------------------|-----------------|
| 1  | ANXA3    | 0                 | 4.106             | Yes             |
| 2  | B2M      | 1                 | 3.936             | Yes             |
| 3  | CD58     | 12                | 2.558             | Yes             |
| 4  | ANXA6    | 18                | 2.147             | Yes             |
| 5  | HLA-A    | 20                | 2.109             | Yes             |
| 6  | CD55     | 25                | 1.815             | Yes             |
| 7  | PCSK9    | 31                | 1.703             | Yes             |
| 8  | ANXA1    | 36                | 1.519             | Yes             |
| 9  | CLIC4    | 39                | 1.438             | Yes             |
| 10 | RAP1A    | 41                | 1.434             | Yes             |
| 11 | HLA-C    | 50                | 1.333             | Yes             |
| 12 | VNN1     | 51                | 1.316             | Yes             |
| 13 | GPRC5A   | 52                | 1.312             | Yes             |
| 14 | ITGB1    | 53                | 1.31              | Yes             |
| 15 | CD109    | 55                | 1.239             | Yes             |
| 16 | CD46     | 56                | 1.232             | Yes             |
| 17 | BSG      | 57                | 1.225             | Yes             |
| 18 | SLC39A14 | 68                | 1.095             | Yes             |
| 19 | ATP2B1   | 69                | 1.093             | Yes             |
| 20 | CD59     | 70                | 1.081             | Yes             |
| 21 | ANXA4    | 73                | 1.036             | Yes             |
| 22 | RAB35    | 80                | 0.989             | Yes             |
| 23 | FOLR1    | 85                | 0.939             | Yes             |
| 24 | DSG1     | 90                | 0.913             | Yes             |
| 25 | RHOG     | 92                | 0.91              | Yes             |
| 26 | CD9      | 95                | 0.893             | Yes             |
| 27 | CD44     | 99                | 0.862             | Yes             |
| 28 | SCARB1   | 104               | 0.832             | Yes             |
| 29 | ANPEP    | 105               | 0.822             | Yes             |
| 30 | ADAM10   | 107               | 0.807             | Yes             |
| 31 | SLC30A1  | 108               | 0.802             | Yes             |
| 32 | CD63     | 117               | 0.749             | Yes             |
| 33 | MYO1C    | 123               | 0.682             | Yes             |
| 34 | RAC1     | 127               | 0.672             | Yes             |
| 35 | RAB1A    | 128               | 0.668             | Yes             |
| 36 | RHOA     | 134               | 0.639             | Yes             |
| 37 | RAB10    | 137               | 0.631             | Yes             |
| 38 | MYOF     | 144               | 0.611             | No              |
| 39 | BST2     | 149               | 0.582             | No              |
| 40 | STOM     | 152               | 0.564             | No              |
| 41 | ANXA7    | 176               | 0.402             | No              |
| 42 | VPS4A    | 199               | 0.253             | No              |
| 43 | TFRC     | 212               | 0.175             | No              |
| 44 | HSPA8    | 219               | 0.145             | No              |
| 45 | RAB7A    | 223               | 0.089             | No              |

|    |        |     |        |    |
|----|--------|-----|--------|----|
| 46 | EHD2   | 237 | -0.017 | No |
| 47 | IQGAP1 | 240 | -0.063 | No |
| 48 | PSAP   | 245 | -0.083 | No |
| 49 | ANXA2  | 252 | -0.148 | No |
| 50 | EHD3   | 254 | -0.157 | No |
| 51 | ITGAV  | 264 | -0.214 | No |
| 52 | PDCD6  | 268 | -0.249 | No |
| 53 | LRP1   | 310 | -0.446 | No |
| 54 | CALR   | 325 | -0.54  | No |
| 55 | SCARB2 | 326 | -0.546 | No |
| 56 | CTSD   | 340 | -0.61  | No |
| 57 | LAMP2  | 344 | -0.656 | No |
| 58 | STX4   | 351 | -0.703 | No |
| 59 | PDIA3  | 353 | -0.713 | No |
| 60 | SRI    | 369 | -0.836 | No |
| 61 | IGF2R  | 375 | -0.858 | No |
| 62 | FABP5  | 378 | -0.874 | No |
| 63 | SPIRE2 | 407 | -1.172 | No |
| 64 | APOE   | 424 | -1.42  | No |
| 65 | CLTC   | 433 | -1.708 | No |
| 66 | DSP    | 434 | -1.748 | No |

**Table S3 key resources table**

| <b>REAGENT or RESOURCE</b>                           | <b>SOURCE</b>                                              | <b>IDENTIFIER</b>                |
|------------------------------------------------------|------------------------------------------------------------|----------------------------------|
| <b>Antibodies</b>                                    |                                                            |                                  |
| Rabbit monoclonal anti-human LC3B                    | Cell Signaling Technology                                  | Cat#3868S; RRID:AB_2137707       |
| Mouse monoclonal anti-human CD63                     | GeneTex                                                    | Cat#GTX28219; RRID:AB_374496     |
| Rabbit Polyclonal anti-human CD63                    | Proteintech                                                | Cat#25682-1-AP; RRID:AB_2783831  |
| Rabbit monoclonal anti-human LAMP1                   | Cell Signaling Technology                                  | Cat#9091; RRID:AB_2687579        |
| Mouse monoclonal anti-human CD9                      | Proteintech                                                | Cat#60232-1-Ig; RRID:AB_11232215 |
| Mouse monoclonal anti-human CD81                     | Proteintech                                                | Cat#66866-1-Ig; RRID:AB_2882203  |
| Rabbit Polyclonal anti-human TSG101                  | Proteintech                                                | Cat#28283-1-AP; RRID:AB_2881104  |
| Rabbit Polyclonal anti-human Calnexin                | Proteintech                                                | Cat#10427-2-AP; RRID:AB_2069033  |
| Rabbit Polyclonal anti-human Cytokeratin 20          | Proteintech                                                | Cat#17329-1-AP; RRID:AB_2133592  |
| Rabbit Polyclonal anti-human Ki-67                   | Proteintech                                                | Cat#27309-1-AP; RRID:AB_2756525  |
| Rabbit Polyclonal anti-human CDX2                    | Proteintech                                                | Cat#22101-1-AP; RRID:AB_3085684  |
| Rabbit Polyclonal anti-human PCNA                    | Proteintech                                                | Cat#10205-2-AP; RRID:AB_2160330  |
| Rabbit Polyclonal anti-human Caspase3                | Proteintech                                                | Cat#25128-1-AP; RRID:AB_3073913  |
| Rabbit Polyclonal anti-human ATG3                    | Proteintech                                                | Cat#11262-2-AP; RRID:AB_2059234  |
| Rabbit Polyclonal anti-human CHMP4B                  | Proteintech                                                | Cat#13683-1-AP; RRID:AB_2877971  |
| Rabbit monoclonal anti-human ALIX                    | Cell Signaling Technology                                  | Cat#92880; RRID:AB_2800192       |
| Rabbit monoclonal anti-human HRS                     | Cell Signaling Technology                                  | Cat#15087; RRID:AB_2798700       |
| Mouse monoclonal anti-human EEA1                     | Cell Signaling Technology                                  | Cat#48453; RRID:AB_2920538       |
| Rabbit Polyclonal anti-human ANXA3                   | Proteintech                                                | Cat#11804-1-AP; RRID:AB_2057455  |
| Rabbit Polyclonal anti-human ANXA3                   | ThermoFisher                                               | Cat#PA5-78780; RRID:AB_2745896   |
| Mouse monoclonal anti-human $\beta$ -actin           | Abbkine                                                    | Cat#A01010; RRID:AB_2737288      |
| HRP, Goat Anti-Rabbit IgG                            | Abbkine                                                    | Cat#A21020; RRID:AB_2876889      |
| HRP, Goat Anti-Mouse IgG                             | Abbkine                                                    | Cat#A21010; RRID:AB_2728771      |
| Goat Anti-Rabbit IgG/Gold 10nm                       | Solarbio                                                   | Cat#K1034G-G10                   |
| Goat Anti-Mouse IgG/Gold 10nm                        | Solarbio                                                   | Cat#K1031G-G10                   |
| Dylight 594, Goat Anti-Rabbit IgG                    | Abbkine                                                    | Cat#A23420;                      |
| Dylight 594, Goat Anti-Mouse IgG                     | Abbkine                                                    | Cat#A23410; RRID:AB_2939057      |
| DyLight 488, Goat Anti-Mouse IgG                     | Abbkine                                                    | Cat#A23210; RRID:AB_2923050      |
| DyLight 488, Goat Anti-Rabbit IgG                    | Abbkine                                                    | Cat#A23220; RRID:AB_2737289      |
| His-Tag Rabbit mAb                                   | Cell Signaling Technology                                  | Cat#12698S; RRID:AB_2744546      |
| Myc-Tag Mouse mAb                                    | Cell Signaling Technology                                  | Cat#2276S; RRID:AB_331783        |
| <b>Biological samples</b>                            |                                                            |                                  |
| Human colorectal cancer tissues                      | The Fourth Affiliated Hospital of China Medical University | N/A                              |
| <b>Chemicals, peptides, and recombinant proteins</b> |                                                            |                                  |
| DMEM                                                 | Procell                                                    | PM150210                         |
| MEM                                                  | Procell                                                    | PM150410                         |
| McCoy's 5A                                           | Procell                                                    | PM150710                         |
| Fetal Bovine Serum                                   | Cell-box                                                   | 164210                           |
| Exosome-Free FBS                                     | NovaCells                                                  | F002P                            |
| Penicillin-Streptomycin Solution                     | Procell                                                    | PB180120                         |
| Trypsin-EDTA Solution                                | Abbkine                                                    | BMU109                           |
| RIPA Lysis Buffer                                    | EpiZyme                                                    | PC103                            |
| Protein Sample Loading Buffer                        | EpiZyme                                                    | LT103                            |
| Tris-Glycine Electrophoresis Buffer                  | Servicebio                                                 | G2152-1L                         |

|                                           |             |             |
|-------------------------------------------|-------------|-------------|
| Western Transfer Buffer                   | Servicebio  | G2154-1L    |
| Western Blocking Buffer                   | EpiZyme     | PS108P      |
| Opti-Protein Ultra Marker                 | Abm         | G623        |
| Bovine Serum Albumin                      | Absin       | abs49001014 |
| DiD Perchlorate                           | Absin       | abs47014947 |
| AbFluor™ 488-Phalloidin                   | Abbkine     | BMD0082     |
| DAPI solution                             | Solarbio    | C0065       |
| Mounting Medium, Antifading               | Solarbio    | S2110       |
| Lipofectamine 3000                        | Invitrogen  | L3000015    |
| Colorectal Cancer Organoid Culture Medium | Organpharma | NGH020001   |
| Primary Tissue Storage Solution           | Organpharma | NGH030020   |
| Tissue Digestion Solution                 | Organpharma | NGH030021   |
| Organoid Cryopreservation Medium          | Organpharma | NGH030023   |
| Extracellular Matrlx                      | Organpharma | NGH030024   |

#### Critical commercial assays

|                                          |             |          |
|------------------------------------------|-------------|----------|
| PAGE Gel Quick Preparation Kit           | EpiZyme     | PG112    |
| In situ PLA kit                          | Duolink     | DUO92101 |
| Annexin V-FITC/PI Apoptosis Kit          | Abbkine     | KTA0002  |
| Cell Counting Kit-8                      | Abbkine     | BMU106   |
| Protein Quantification Kit               | Abbkine     | KTD3001  |
| West Femto Maximum Sensitivity Substrate | Abbkine     | BMU102   |
| Protein A/G Magnetic Beads               | Biolinkedin | L-1004   |

#### Experimental models: Cell lines

|          |                                            |                                  |
|----------|--------------------------------------------|----------------------------------|
| Hela     | Zhong Qiao Xin Zhou                        | Cat#ZQ0068; RRID: CVCL_0030      |
|          | Biotechnology                              |                                  |
| Huh7     | Zhong Qiao Xin Zhou                        | Cat#ZQ0025; RRID: CVCL_0336      |
|          | Biotechnology                              |                                  |
| HCT116   | Zhong Qiao Xin Zhou                        | Cat#ZQ0125; RRID: CVCL_0291      |
|          | Biotechnology                              |                                  |
| HcerEpic | Otwo Biotechnology                         | Cat#HTX2613                      |
| THLE-2   | Zhejiang Noble Biological Products Co.,Ltd | Cat#nobcell0548; RRID: CVCL_3803 |
| NCM460   | Hunan Fenghui Biotechnology Co., Ltd       | Cat#CL0393; RRID: CVCL_0460      |

#### Experimental models: Organisms/strains

|                 |                    |     |        |
|-----------------|--------------------|-----|--------|
| BALB/cA-nu Mice | BEIJING BIOSCIENCE | HFk | 13001A |
|-----------------|--------------------|-----|--------|

#### Oligonucleotides

|                                              |            |
|----------------------------------------------|------------|
| Human HRS siRNA 1:<br>CCAUCAAGAAGAAAGUCAATT  | This paper |
| Human HRS siRNA 2:<br>GGAACGAGCCCAAGUACAATT  | This paper |
| Human HRS siRNA 3:<br>GCAUGAAGAGUAACCACAUTT  | This paper |
| Human ALIX siRNA 1:<br>GAGACGCUCCUGAGAUAUUTT | This paper |
| Human ALIX siRNA 2:<br>GCUUGACAUUUACCGGAATT  | This paper |
| Human ALIX siRNA 3:                          | This paper |

GGAAGGAUGCUUUCGAUAATT

Human ANXA3 sgRNA 1: This paper

TCCAGACTTTAGCCCATCAG

Human ANXA3 sgRNA 2: This paper

TCATCAGCATTCTGACTGAG

Human ANXA3 sgRNA 3: This paper

TTTGCATCAAAGACTGCTGG

Human ATG3 shRNA : This paper

TGTCATTCCAACAATAGAA

Human ALIX sgRNA 1: This paper

AAAGACCTCAGAGGTGGACC

Human ALIX sgRNA 2: This paper

TGCTGGATGAACTTCACCAG

Human ALIX sgRNA 3: This paper

CGTCCGCTGGACAAGCACGA

#### Recombinant DNA

|                 |         |        |
|-----------------|---------|--------|
| EGFP-Rab5A Q79L | Addgene | #28046 |
|-----------------|---------|--------|

|          |          |     |
|----------|----------|-----|
| GFP-CD63 | Genechem | N/A |
|----------|----------|-----|

|              |          |     |
|--------------|----------|-----|
| RFP-GFP-LC3B | Genechem | N/A |
|--------------|----------|-----|

|                          |            |     |
|--------------------------|------------|-----|
| ALIX $\Delta$ PRR-Cherry | This paper | N/A |
|--------------------------|------------|-----|

|                 |            |     |
|-----------------|------------|-----|
| Myc-HRS plasmid | This paper | N/A |
|-----------------|------------|-----|

|                  |            |     |
|------------------|------------|-----|
| His-ALIX plasmid | This paper | N/A |
|------------------|------------|-----|

#### Software and algorithms

|                      |          |                                                                   |
|----------------------|----------|-------------------------------------------------------------------|
| Graphpad Prism 8.0.1 | Graphpad | <a href="https://www.graphpad.com/">https://www.graphpad.com/</a> |
|----------------------|----------|-------------------------------------------------------------------|

|             |        |                                                             |
|-------------|--------|-------------------------------------------------------------|
| ImageJ 1.53 | ImageJ | <a href="https://ImageJ.nih.gov">https://ImageJ.nih.gov</a> |
|-------------|--------|-------------------------------------------------------------|

|                |        |                                                               |
|----------------|--------|---------------------------------------------------------------|
| FlowJo_v10.6.2 | FlowJo | <a href="https://www.flowjo.com/">https://www.flowjo.com/</a> |
|----------------|--------|---------------------------------------------------------------|

|                          |     |                                                                                                         |
|--------------------------|-----|---------------------------------------------------------------------------------------------------------|
| NIS-Elements Viewer 5.21 | NIS | <a href="https://www.microscope.healthcare.nikon.com/">https://www.microscope.healthcare.nikon.com/</a> |
|--------------------------|-----|---------------------------------------------------------------------------------------------------------|

|                   |            |     |
|-------------------|------------|-----|
| NanoViewer 2.8.10 | NanoViewer | N/A |
|-------------------|------------|-----|

**Table S4. Specific concentrations of antibodies used in Western blot**

| Antibody                                   | Source                    | Dilution |
|--------------------------------------------|---------------------------|----------|
| Rabbit monoclonal anti-human LC3B          | Cell Signaling Technology | 1:1000   |
| Mouse monoclonal anti-human CD63           | GeneTex                   | 1:1000   |
| Rabbit Polyclonal anti-human CD63          | Proteintech               | 1:1000   |
| Rabbit monoclonal anti-human LAMP1         | Cell Signaling Technology | 1:1000   |
| Mouse monoclonal anti-human CD9            | Proteintech               | 1:10000  |
| Mouse monoclonal anti-human CD81           | Proteintech               | 1:3000   |
| Rabbit Polyclonal anti-human TSG101        | Proteintech               | 1:5000   |
| Rabbit Polyclonal anti-human Calnexin      | Proteintech               | 1:10000  |
| Rabbit Polyclonal anti-human ATG3          | Proteintech               | 1:5000   |
| Rabbit Polyclonal anti-human CHMP4B        | Proteintech               | 1:5000   |
| Rabbit monoclonal anti-human ALIX          | Cell Signaling Technology | 1:1000   |
| Rabbit monoclonal anti-human HRS           | Cell Signaling Technology | 1:1000   |
| Rabbit Polyclonal anti-human ANXA3         | Proteintech               | 1:3000   |
| Rabbit Polyclonal anti-human ANXA3         | ThermoFisher              | 1:1000   |
| Mouse monoclonal anti-human $\beta$ -actin | Abbkine                   | 1:10000  |

|                           |                           |         |
|---------------------------|---------------------------|---------|
| HRP, Goat Anti-Rabbit IgG | Abbkine                   | 1:10000 |
| HRP, Goat Anti-Mouse IgG  | Abbkine                   | 1:10000 |
| His-Tag Rabbit mAb        | Cell Signaling Technology | 1:1000  |
| Myc-Tag Mouse mAb         | Cell Signaling Technology | 1:1000  |
